# Supplementary material
Source: publisher figshare collection journal article supplement (https://geolsoc.figshare.com/ndownloader/files/12487388)

**Supplementary Table 3:**

*Summary table of the alteration of crystal structures and mineral compositions. Pph = plagioclase phenocryst (>2 mm), Pgm = plagioclase groundmass (<1 mm), Cpx = clinopyroxene, Op = opaques, S = sericite, Ch = chlorine, UC = unidentified clays.*

| Sample             | Elevation<br>(m AOD) | Alteration<br>(0-10) | Composition                                                           | Description                                                                                                                                                                |
|--------------------|----------------------|----------------------|-----------------------------------------------------------------------|----------------------------------------------------------------------------------------------------------------------------------------------------------------------------|
| <b>BTDF-001</b>    | 134                  | 3                    | Pgm: ~50%<br>Pph: ~20%<br>Cpx: ~15%<br>Op: ~10%<br>S: ~5%             | Plagioclase phenocrysts display some sericite alteration with some fractures and albite twinning. Some reabsorption on crystal boundaries.                                 |
| <b>LB1-955-960</b> | 6                    | 1                    | Pgm: ~70%<br>Cpx: ~25%<br>Op: ~5%                                     | Clean, clear delineation between plagioclase & clinopyroxene - plagioclase with 1 <sup>st</sup> order birefringence greys and albite twinning.                             |
| <b>LB1-970-975</b> | 1                    | 2                    | Pgm: ~55%<br>Cpx: ~30%<br>Op: ~10%<br>S: ~5%                          | Microcrystalline groundmass of plagioclase displaying 1 <sup>st</sup> order birefringence greys with slight sericite alteration on crystal boundaries.                     |
| <b>NLBT-006</b>    | 351                  | 4                    | Pgm: ~40%<br>Pph: ~15%<br>Cpx: ~15%<br>S: ~15%<br>Op: ~10%<br>Ch: ~5% | Plagioclase crystals are partly altered to sericite, but display albite twinning in groundmass. Slight chlorine alteration of clinopyroxene and growth of secondary clays. |
| <b>VCAQ-001</b>    | 198                  | 1                    | Pg: ~55%<br>Cpx: ~30%<br>Op: ~10%<br>S: ~5%                           | Plagioclase displays albite twinning and sharp crystal edges, some zonation in larger crystals. Sericite alteration in small amount of crystals.                           |

BTDF-001 - 3/10

*Plane Polarised Light*

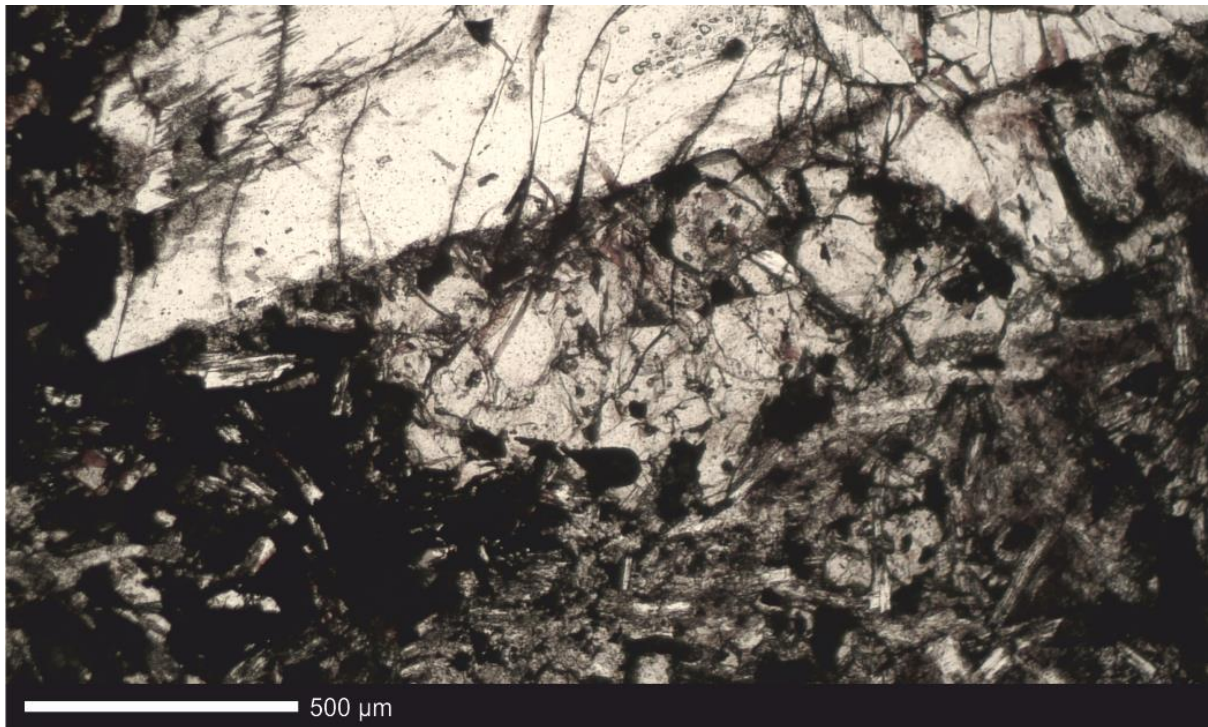

*Cross Polarised Light*

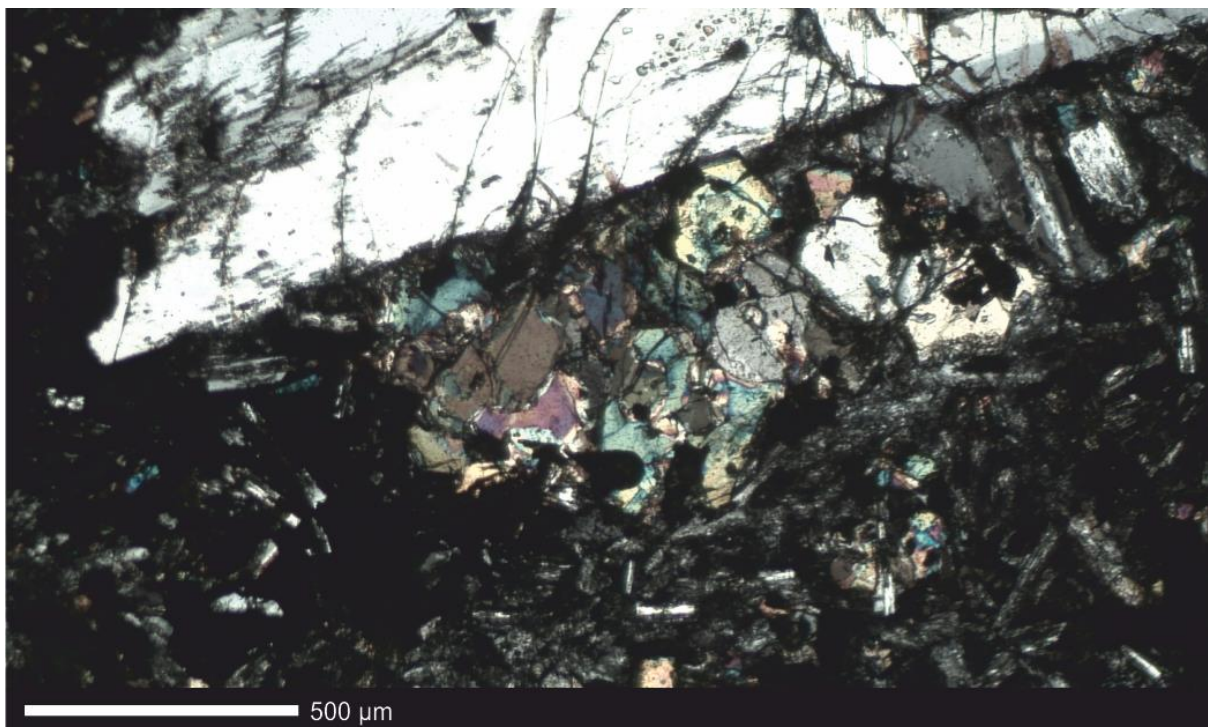



LB1-955-960 - 1/10

*Plane Polarised Light*

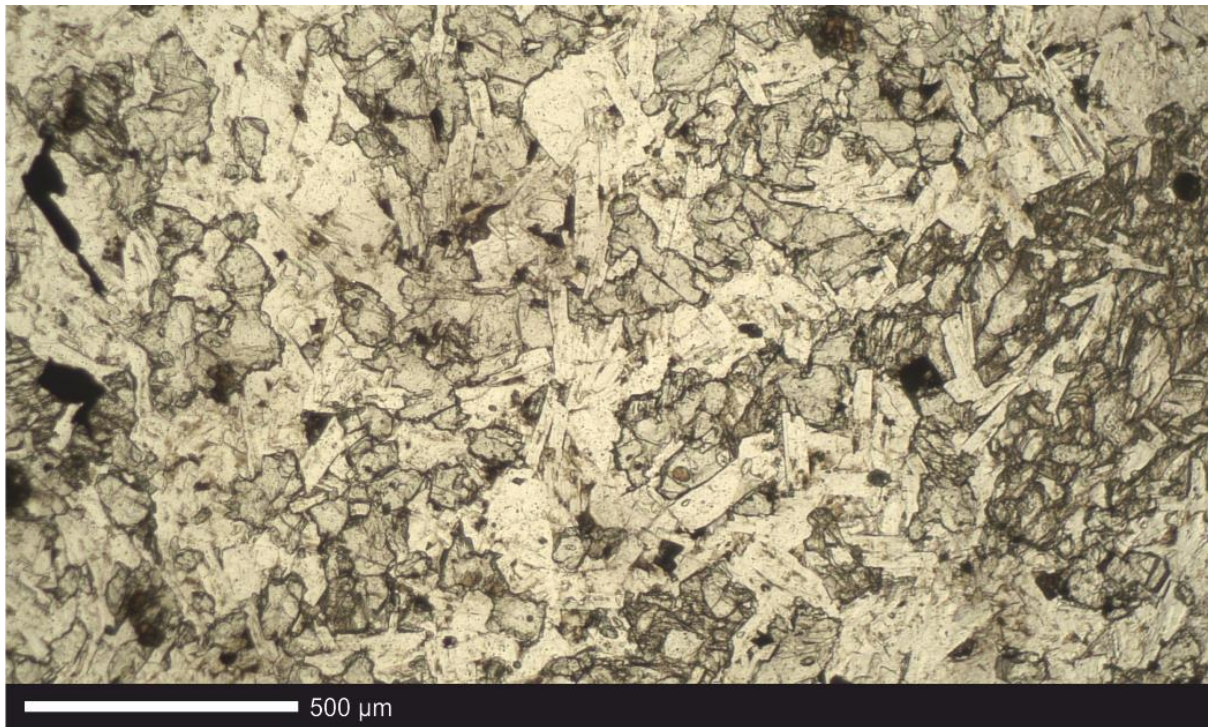

*Cross Polarised Light*

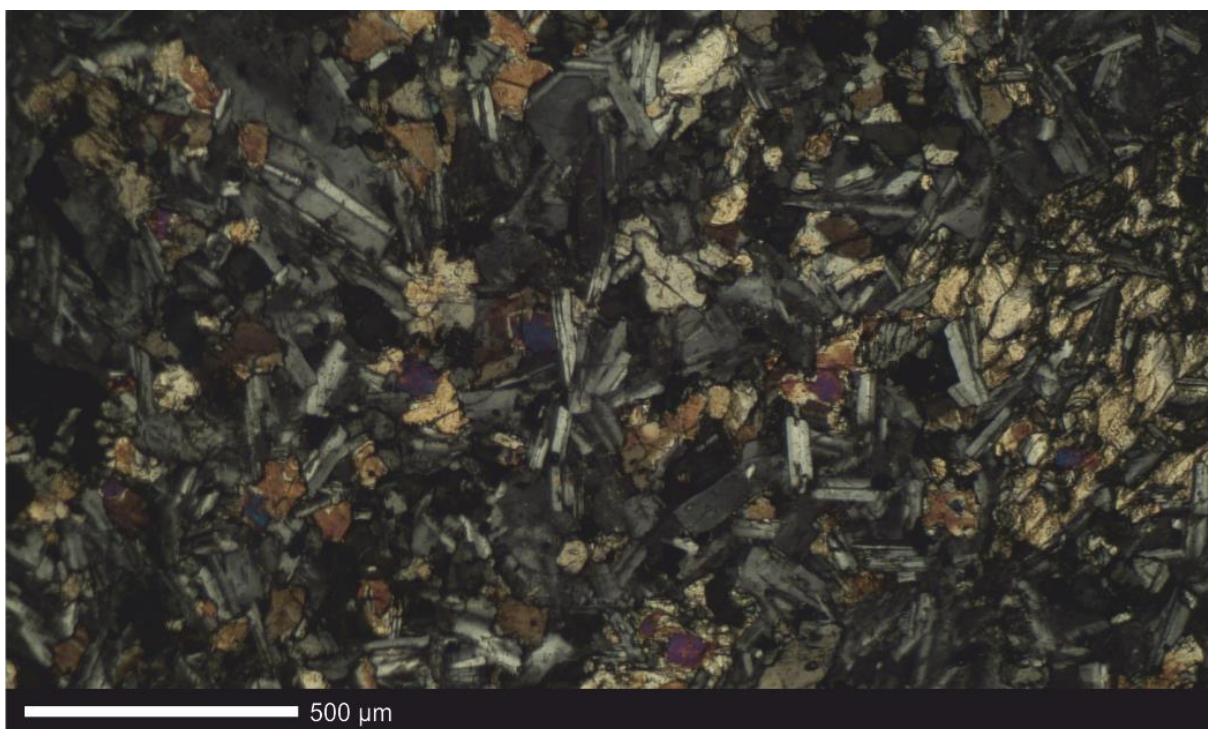



LB1-970-975 - 2/10

*Plane Polarised Light*

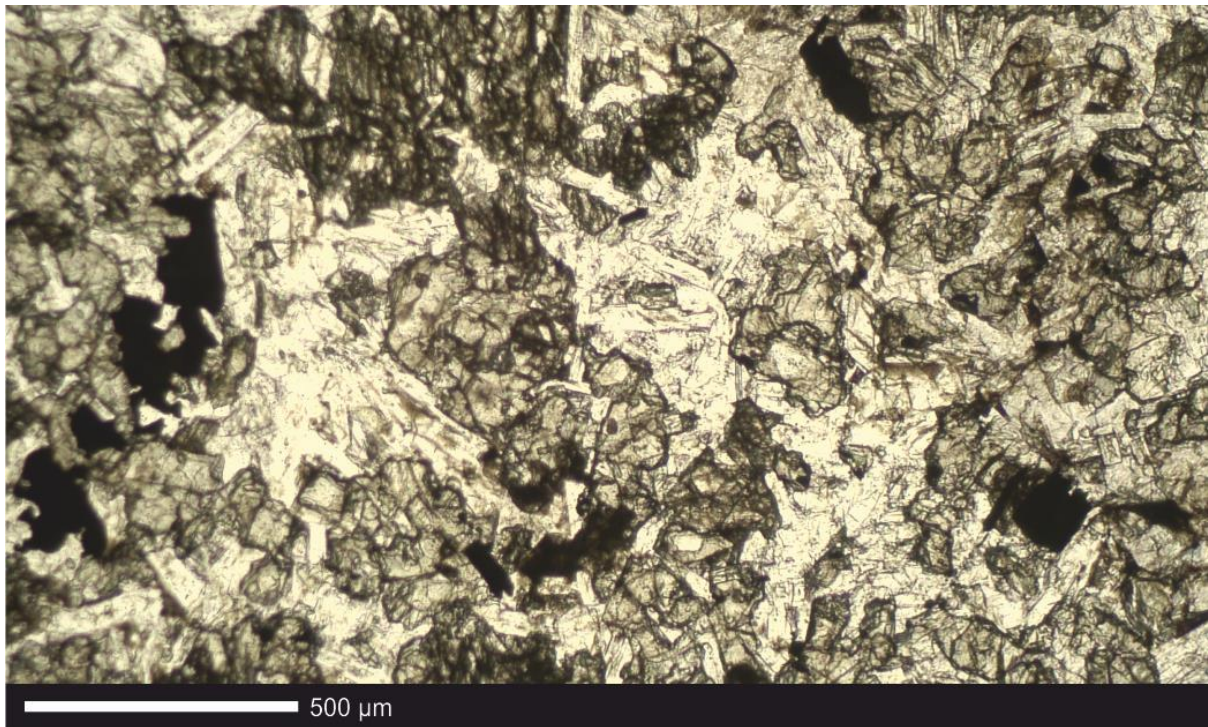

*Cross Polarised Light*

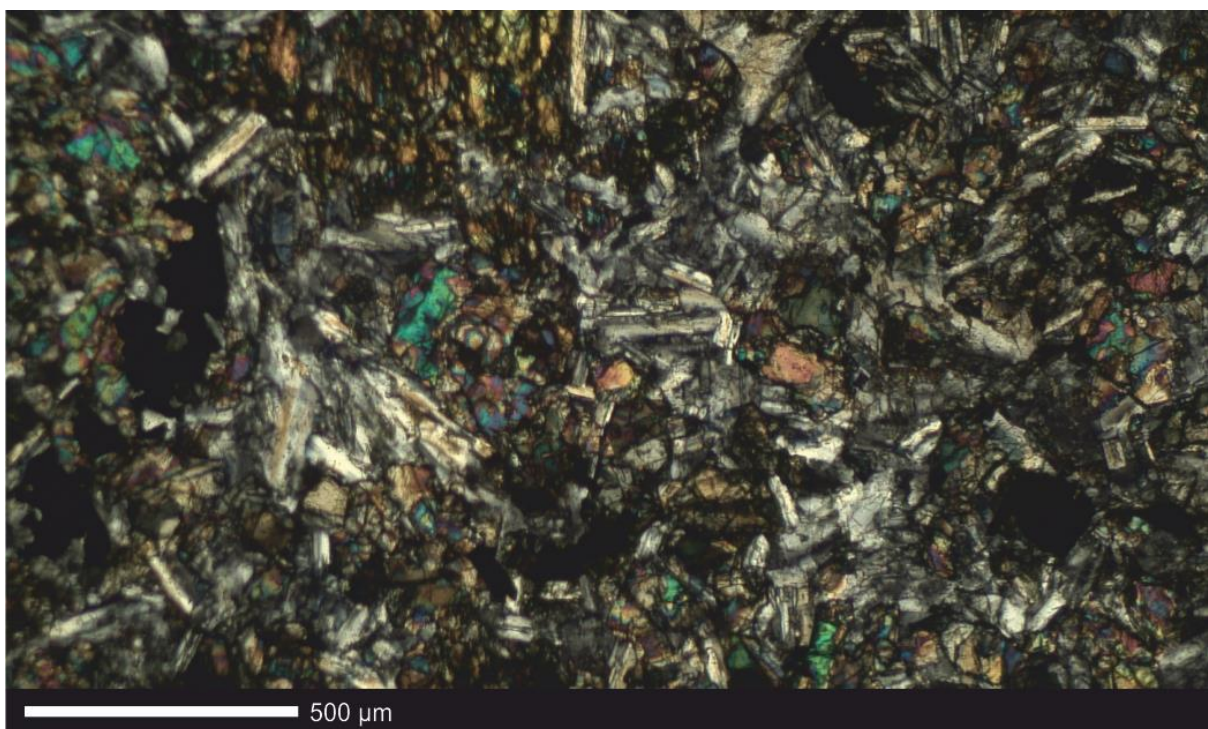



NLBT-006 - 4/10

*Plane Polarised Light*

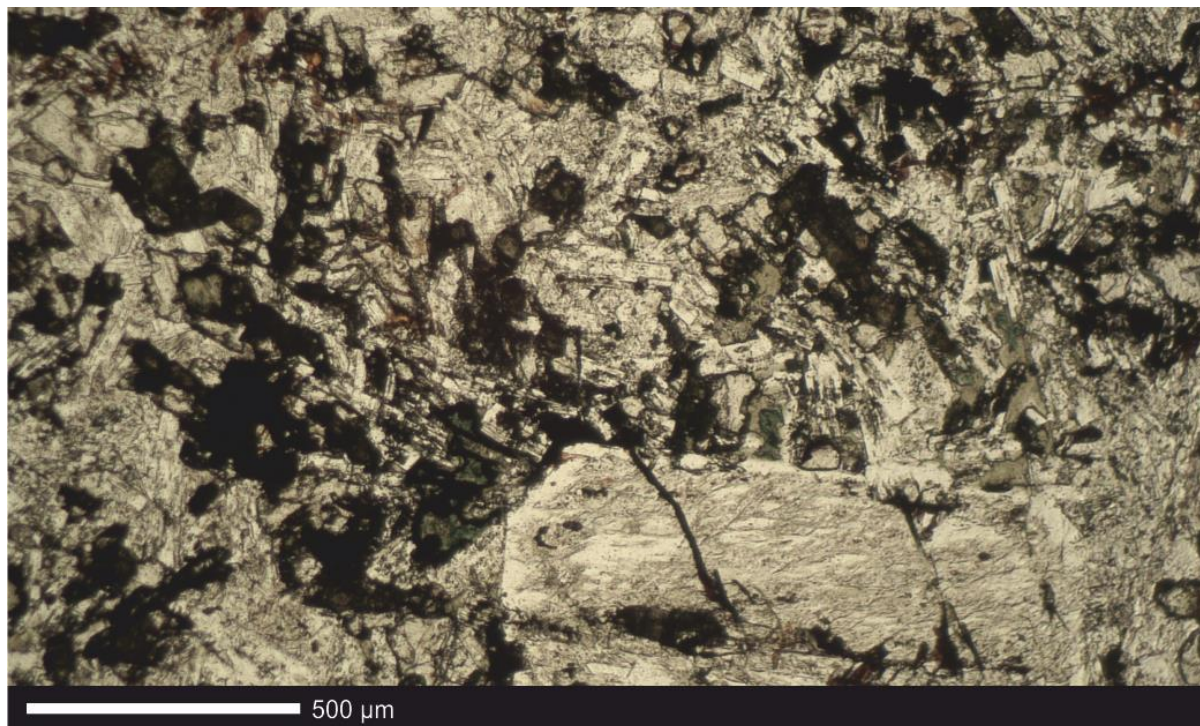

*Cross Polarised Light*

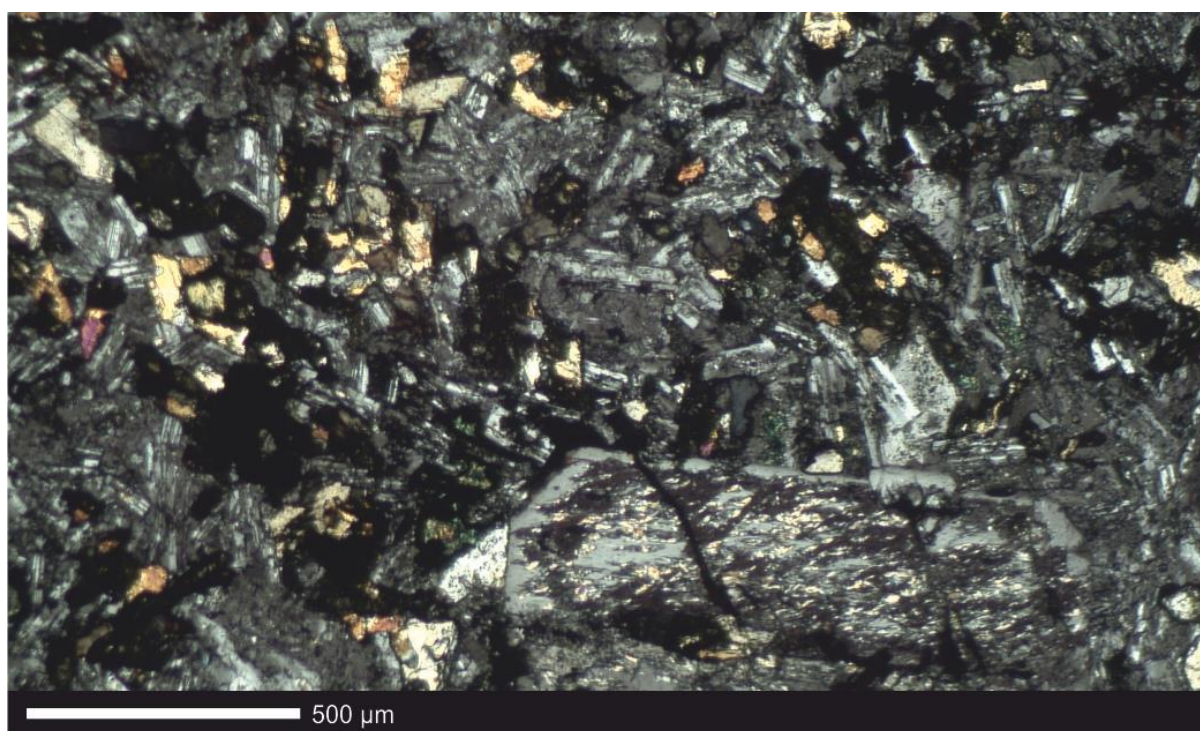



VCAQ-001 - 1/10

*Plane Polarised Light*

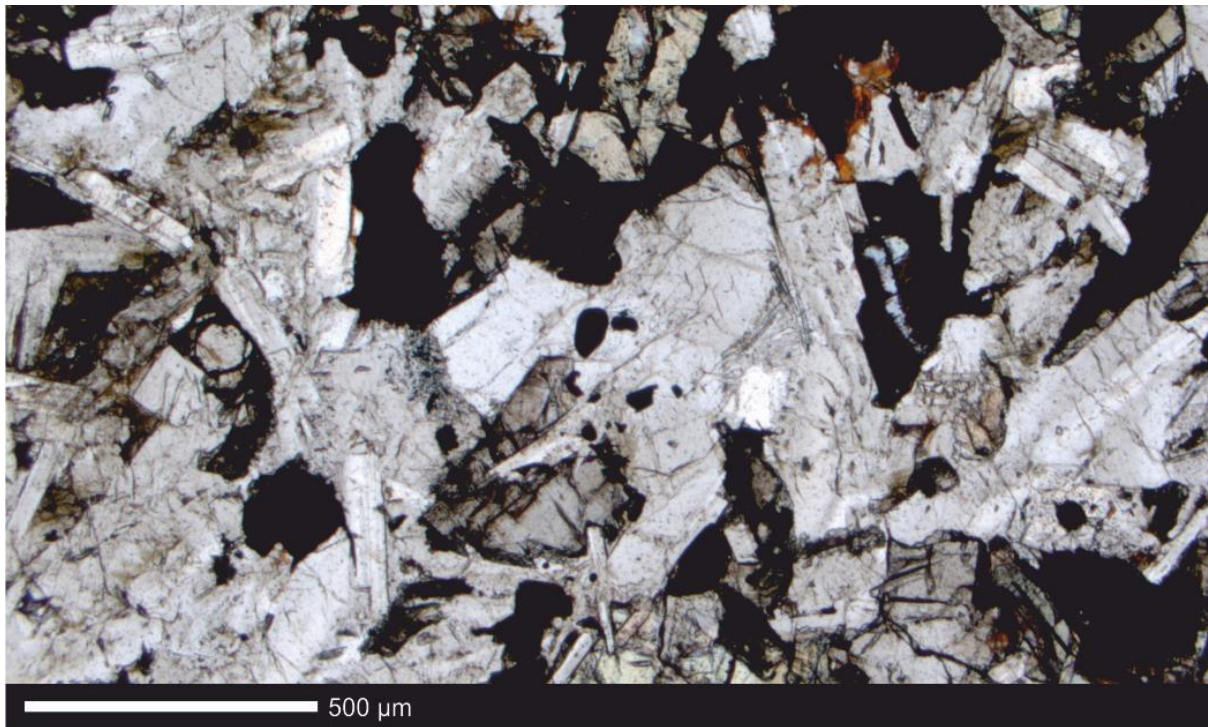

*Cross Polarised Light*

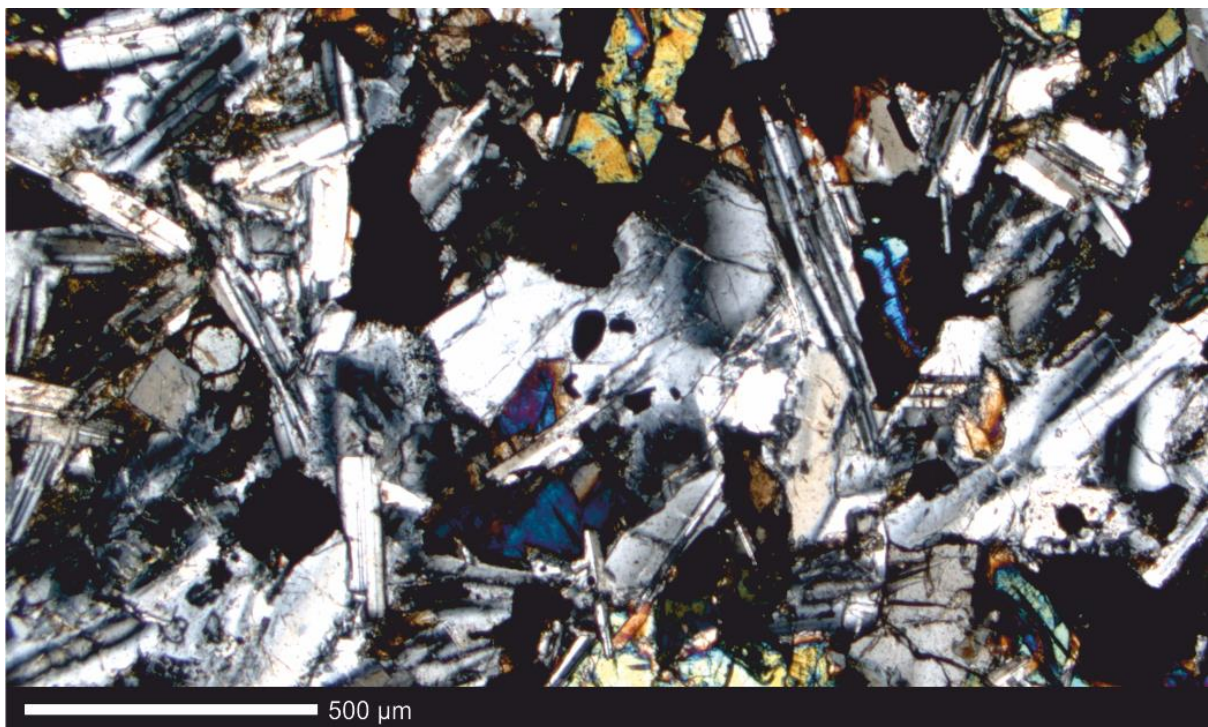

Supplement: Supplementary file 1 [file 12487388]
